# Supplementary material for: Computational studies and synthesis of 131iodine-labeled nocardiotide A analogs as a peptide-based theragnostic radiopharmaceutical ligand for cancer targeting SSTR2
Source: Royal Society of Chemistry journal article supplement (doi:10.1039/d4ra00684d), 2024-01-01
Supplement: d4ra00684d1.pdf [file d4ra00684d1.pdf]

## Supporting Information

### Computational Studies and Synthesis of <sup>131</sup>Iodine-labeled Nocardiotide A analogs as a peptide-based theragnostic radiopharmaceutical ligand for cancer targeting SSTR2

Rizky Juwita Sugiharti<sup>a,b</sup>, Rani Maharani<sup>\*c</sup>, Fransiska Kurniawan<sup>a</sup>, Rahmana Emran Kartasasmita<sup>a</sup>,  
Daryono Hadi Tjahjono<sup>\*a</sup>

<sup>a</sup>School of Pharmacy, Bandung Institute of Technology, Bandung, Indonesia

<sup>b</sup>Research Center for Radioisotope, Radiopharmaceutical, and Biodosimetry Technology, National Research and Innovation Agency, Indonesia

<sup>c</sup>Department of Chemistry, Faculty of Mathematics and Natural Sciences, Universitas Padjadjaran, Jatinangor, Indonesia

Corresponding author

Dr. Daryono Hadi Tjahjono

School of Pharmacy, Bandung Institute of Technology, Bandung, Indonesia

e-mail: daryonohadi@fa.itb.ac.id.

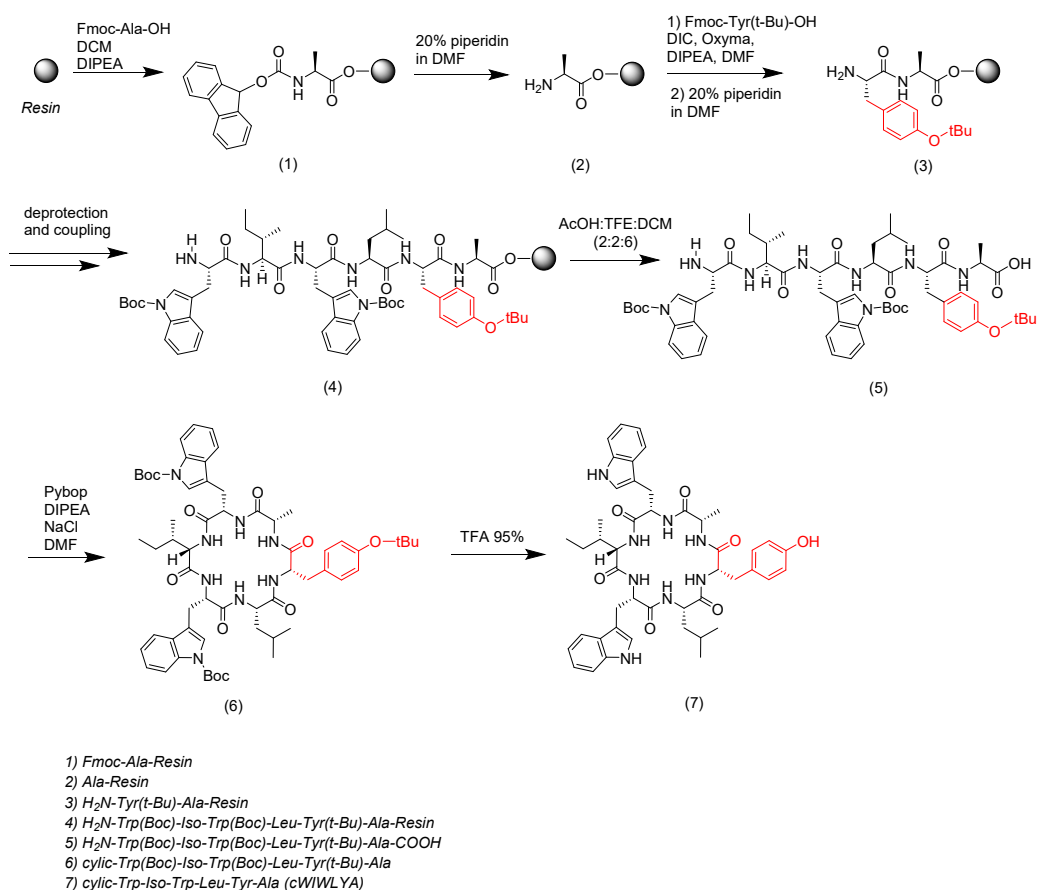

Figure S.1. Synthesis of cWIWLYA

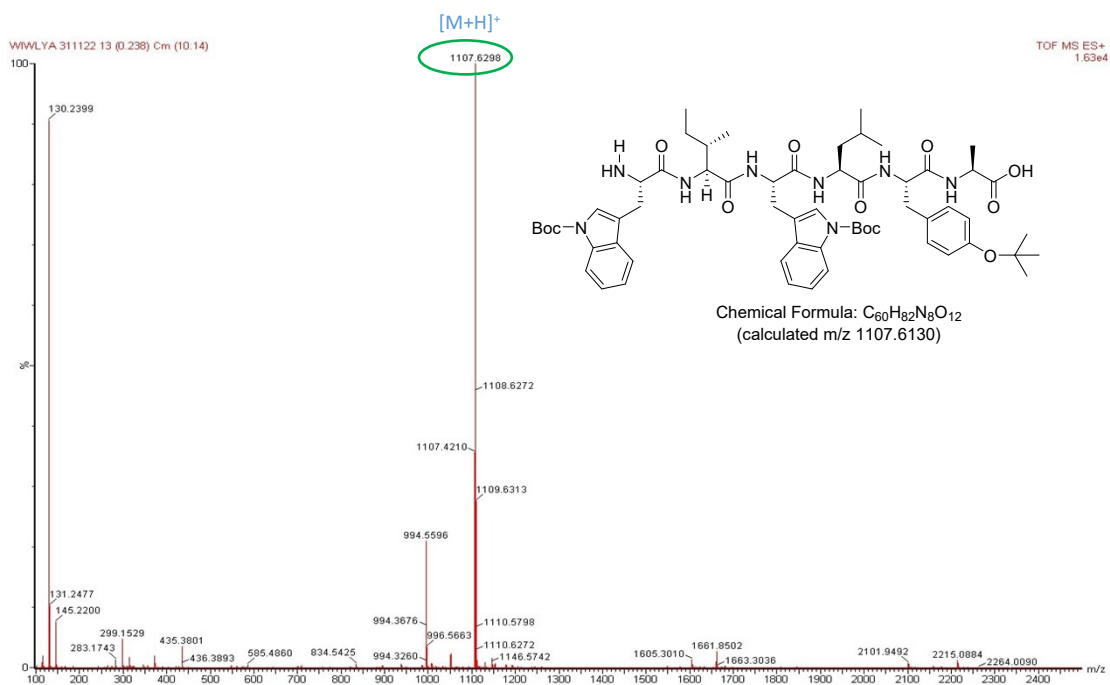

Figure S.2. Mass spectrum of protected linear WIWLYA [L-(NH<sub>2</sub>-Trp(Boc)-Ile-Trp(Boc)-Leu-Tyr(tBu)-Ala-COOH)]

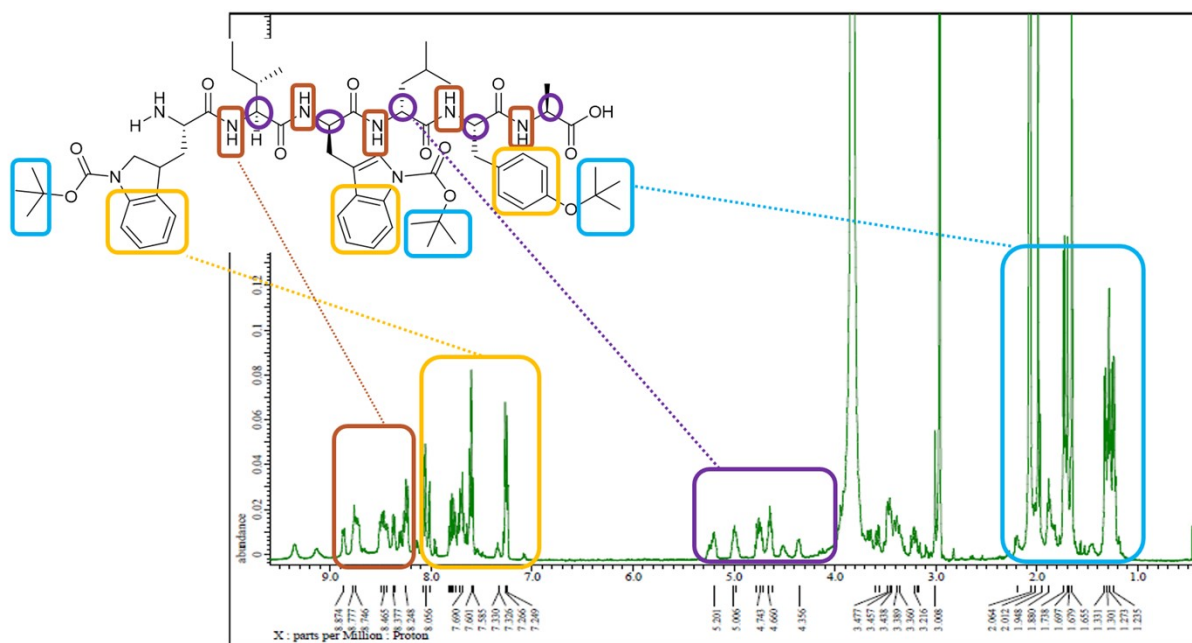

Figure S.3 <sup>1</sup>H-NMR spectrum of protected linear WIWLYA [L-(NH<sub>2</sub>-Trp(Boc)-Ile-Trp(Boc)-Leu-Tyr(tBu)-Ala-COOH)] (500 MHz, (CD<sub>3</sub>)<sub>2</sub>SO)

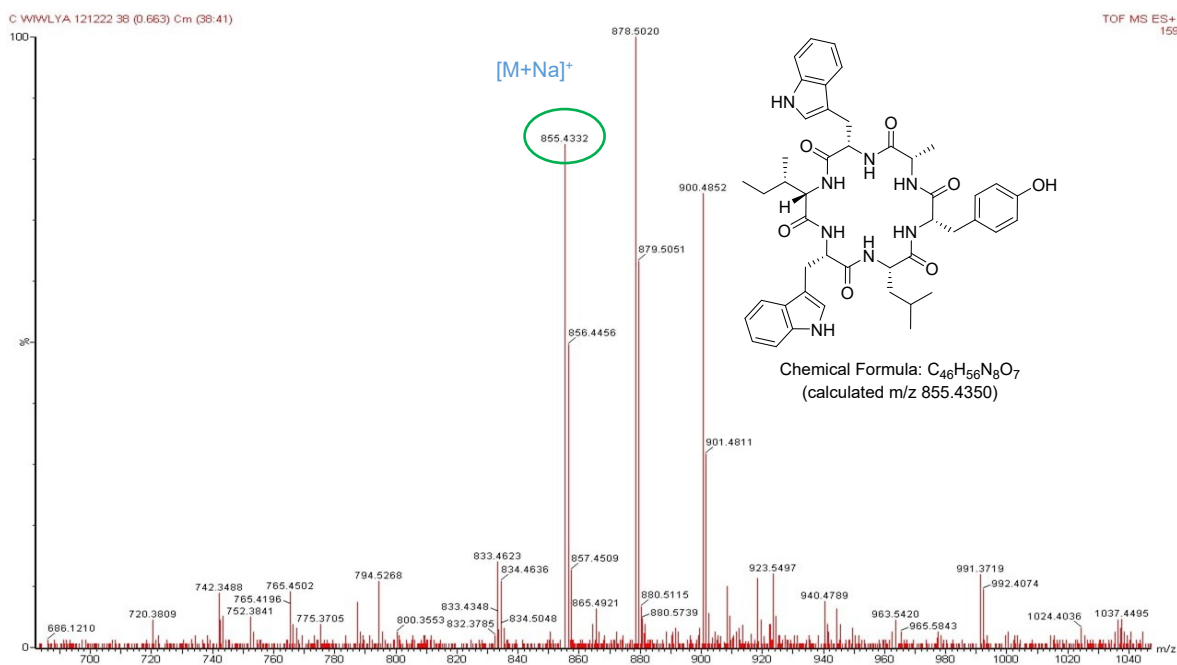

Figure S.4. Mass spectrum of cWIWLYA [cyclic-L-Trp-Ile-Trp-Leu-Tyr-Ala]

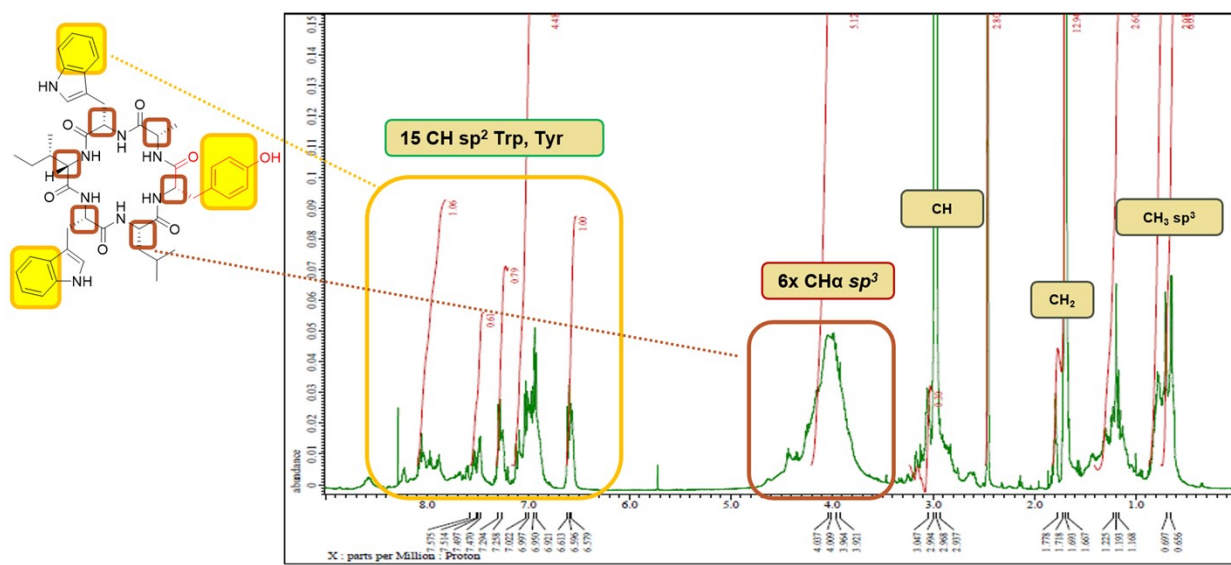

Figure S.5 <sup>1</sup>H-NMR spectrum of cWIWLYA [cyclic-L-Trp-Ile-Trp-Leu-Tyr-Ala] (500 MHz, (CD<sub>3</sub>)<sub>2</sub>SO)

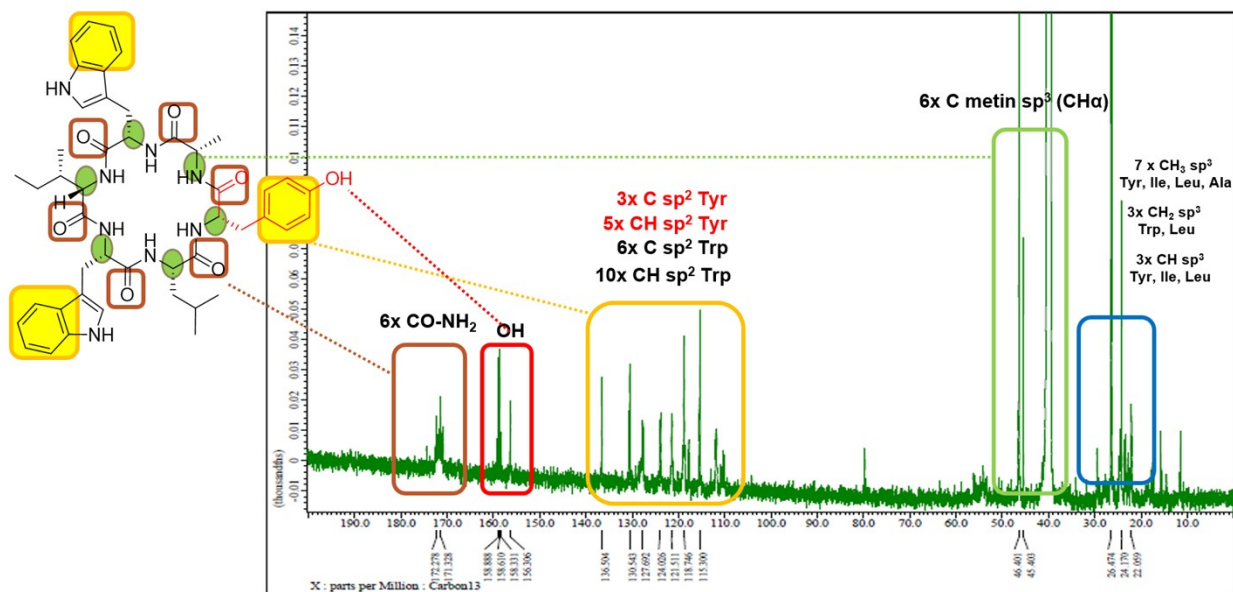

Figure S.6 <sup>13</sup>C-NMR spectrum of cWIWLVA [cyclic-L-Trp-Ile-Trp-Leu-Tyr-Ala] (125 MHz, (CD<sub>3</sub>)<sub>2</sub>SO)

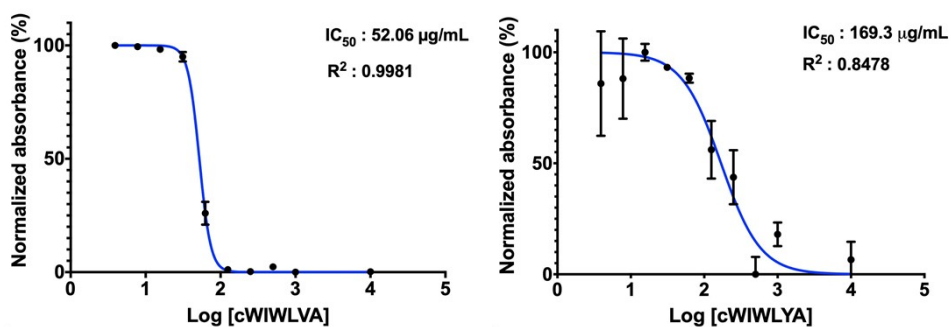

Figure S.7. The dose-response curve of nocardiotide A analog cWIWLVA and lead compound of cWIWLVA

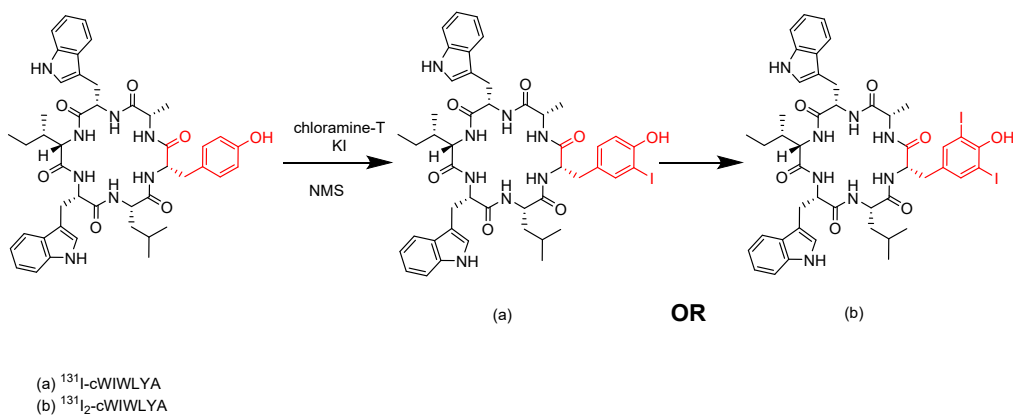

Figure S.8. Iodination of cWIWLVA

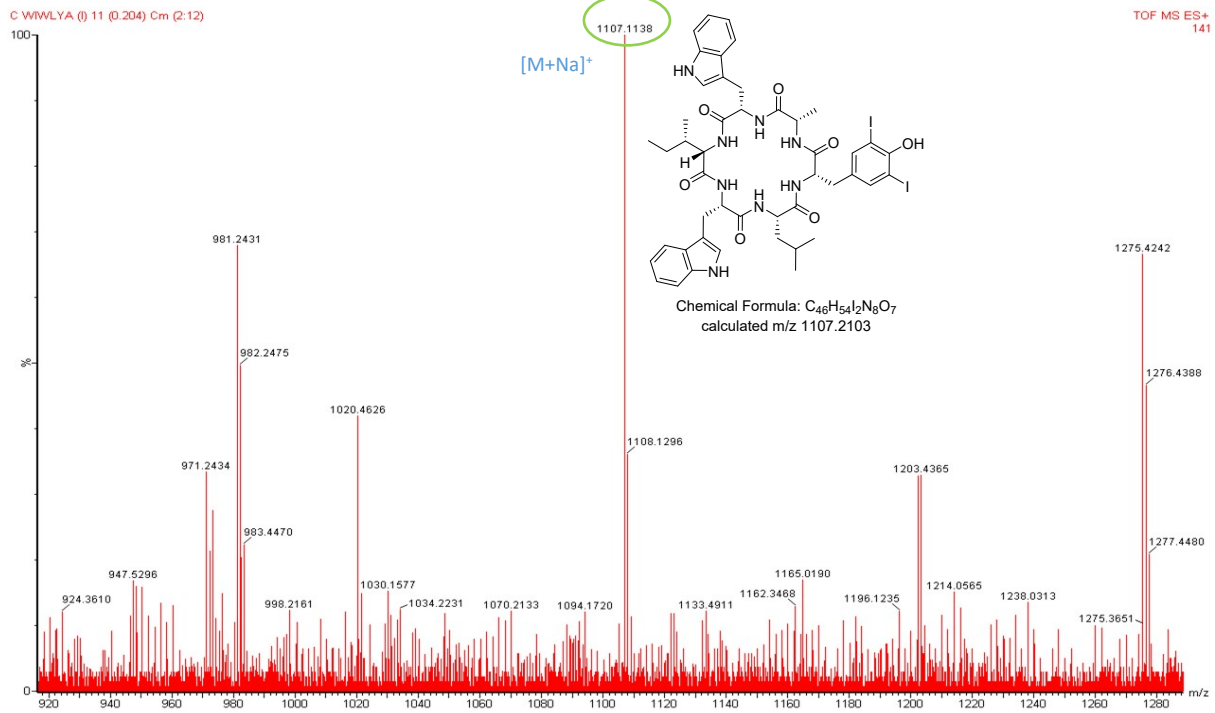

Figure S.9. Mass spectrum of I<sub>2</sub>-cWIWLYA (di-iodinated)
